# Supplementary material for: Duration of total contact casting for resolution of acute Charcot foot: a retrospective cohort study
Source: J Foot Ankle Res. 2021 Jun 15;14:44. doi: 10.1186/s13047-021-00477-5 (PMC8204579; doi:10.1186/s13047-021-00477-5)
Supplement: Supplementary file 1 — Additional file 1. Adobe professional. Screening tool and data collection form. Screening tool used to identify eligible participants and data collection form used to collate the participant data. [file 13047_2021_477_MOESM1_ESM.pdf]

# SCREENING TOOL / DATA COLLECTION FORM

## SCREENING FOR ELIGIBILITY

|                                                                                            |     |                          |    |                          |                        |
|--------------------------------------------------------------------------------------------|-----|--------------------------|----|--------------------------|------------------------|
| <b>Charcot episode of care between<br/>4 January 2012 – 4 January 2015:</b>                | Yes | <input type="checkbox"/> | No | <input type="checkbox"/> | <i>If NO, exclude</i>  |
| <b>Acute Charcot foot:</b><br>(i.e. Modified Eichenholtz stage 0 or 1)                     | Yes | <input type="checkbox"/> | No | <input type="checkbox"/> | <i>If NO, exclude</i>  |
| <b>≥18 years of age:</b>                                                                   | Yes | <input type="checkbox"/> | No | <input type="checkbox"/> | <i>If NO, exclude</i>  |
| <b>TCC treatment for ulcer or fracture:</b><br>(i.e. not Charcot-related)                  | Yes | <input type="checkbox"/> | No | <input type="checkbox"/> | <i>If YES, exclude</i> |
| <b>Concurrent rheumatic condition:</b><br>(e.g. rheumatoid arthritis)                      | Yes | <input type="checkbox"/> | No | <input type="checkbox"/> | <i>If YES, exclude</i> |
| <b>Concurrent inflammatory condition:</b><br>(e.g. systemic lupus erythematosus)           | Yes | <input type="checkbox"/> | No | <input type="checkbox"/> | <i>If YES, exclude</i> |
| <b>Current foot infection:</b><br>(e.g. cellulitis, erysipelas, osteomyelitis)             | Yes | <input type="checkbox"/> | No | <input type="checkbox"/> | <i>If YES, exclude</i> |
| <b>Transfer or withdrawal from HRFS:</b><br>(i.e. between 4 January 2012 – 4 January 2015) | Yes | <input type="checkbox"/> | No | <input type="checkbox"/> | <i>If YES, exclude</i> |

**\* If participant satisfies all eligibility criteria, continue with assessment \***

## DATA COLLECTION

### 1. PARTICIPANT CHARACTERISTICS

Date of assessment: \_\_\_\_\_

Date of birth:    /    /      Sex:      Male    ☐<sub>1</sub>    Female    ☐<sub>0</sub>

Known ETOH abuse:      Yes    ☐<sub>1</sub>    No    ☐<sub>0</sub>

Smoking history:      Past    ☐<sub>1</sub>    Current ☐<sub>2</sub>    Never    ☐<sub>3</sub>

### 2. COMORBIDITIES

Diabetes mellitus:      Yes    ☐<sub>1</sub>    No    ☐<sub>0</sub>

Type of diabetes:      Type 1 ☐<sub>1</sub>    Type 2 ☐<sub>2</sub>

Date of diagnosis: \_\_\_\_\_ Duration of diabetes (years): \_\_\_\_\_

Latest HbA1c result: \_\_\_\_\_ (%)

Dyslipidaemia:      Yes    ☐<sub>1</sub>    No    ☐<sub>0</sub>

Hypertension:      Yes    ☐<sub>1</sub>    No    ☐<sub>0</sub>

Ischaemic heart disease:      Yes    ☐<sub>1</sub>    No    ☐<sub>0</sub>

Congestive cardiac failure:      Yes    ☐<sub>1</sub>    No    ☐<sub>0</sub>

Cerebrovascular disease:      Yes    ☐<sub>1</sub>    No    ☐<sub>0</sub>

Chronic kidney disease:      Yes    ☐<sub>1</sub>    No    ☐<sub>0</sub>

Osteoarthritis:      Yes    ☐<sub>1</sub>    No    ☐<sub>0</sub>

Previous foot ulceration:      Yes    ☐<sub>1</sub>    No    ☐<sub>0</sub>

Previous foot infection:      Yes    ☐<sub>1</sub>    No    ☐<sub>0</sub>

Previous amputation:      Yes    ☐<sub>1</sub>    No    ☐<sub>0</sub>

### 3. NEUROVASCULAR FOOT ASSESSMENTS

#### 3.1 Neurological assessment

| Protective sensation (Semmes-Weinstein 5.07/10 g monofilament) |                |                              |                              |
|----------------------------------------------------------------|----------------|------------------------------|------------------------------|
|                                                                | Plantar Hallux | Plantar 3 <sup>rd</sup> MTPJ | Plantar 5 <sup>th</sup> MTPJ |
| Left foot                                                      |                |                              |                              |
| Right foot                                                     |                |                              |                              |

MTPJ, Metatarsophalangeal joint.

✓ = present, ✗ = absent (score /3 both feet)

Note. Inability to detect the monofilament at ≥1 site(s) will indicate peripheral neuropathy.

Peripheral neuropathy: Yes ☐<sub>1</sub> No ☐<sub>0</sub>

#### 3.2 Arterial assessment

| Pedal pulses |                |                  |
|--------------|----------------|------------------|
|              | Dorsalis pedis | Posterior tibial |
| Left foot    |                |                  |
| Right foot   |                |                  |

✓ = present, ✗ = absent (score /2 both feet)

Note. Absence of ≥2 pedal pulses on both feet indicates peripheral arterial disease.

| Ankle-brachial pressure index (ABPI) and toe-brachial pressure index (TPBI) |      |       |
|-----------------------------------------------------------------------------|------|-------|
|                                                                             | Left | Right |
| Toe systolic pressure (mmHg)                                                |      |       |
| Ankle systolic pressure (mmHg)                                              |      |       |
| Brachial systolic pressure (mmHg)                                           |      |       |
| ABPI value                                                                  |      |       |
| TBPI value                                                                  |      |       |

ABPI, Ankle brachial index; TBPI, Toe brachial index.

Note. ABPI ≤0.9 and/or TBPI ≤0.6 indicates peripheral arterial disease. ABPI >1.3 or non-compressible arteries (i.e. >240 mm Hg) indicates medial arterial calcification.

Peripheral arterial disease: Yes ☐<sub>1</sub> No ☐<sub>0</sub>

#### 4. CHARCOT FOOT HISTORY

Left foot ☐<sub>1</sub> Right foot ☐<sub>2</sub> Bilateral ☐<sub>3</sub>

Stage of Charcot: Eichenholtz stage 0 ☐<sub>1</sub> Eichenholtz stage 1 ☐<sub>2</sub>

Date of diagnosis: \_\_\_\_\_

Duration of Charcot foot (months): \_\_\_\_\_

##### Charcot trigger:

- ☐<sub>1</sub> Ulceration
- ☐<sub>2</sub> Injury/trauma
- ☐<sub>3</sub> Amputation
- ☐<sub>4</sub> Lymphoedema
- ☐<sub>5</sub> Unknown

Misdiagnosis of Charcot foot: Yes ☐<sub>1</sub> No ☐<sub>0</sub>  
(i.e. prior to attending HRFC)

##### Charcot foot pattern:

- ☐<sub>1</sub> Forefoot joints
- ☐<sub>2</sub> Tarsometatarsal joints
- ☐<sub>3</sub> Naviculocuneiform, talonavicular and calcaneocuboid joints
- ☐<sub>4</sub> Ankle and subtalar joints
- ☐<sub>5</sub> Calcaneus
- ☐<sub>6</sub> Combination \_\_\_\_\_ (describe)

##### Diagnostic imaging:

X-ray: Yes ☐<sub>1</sub> No ☐<sub>0</sub>

Initial date of imaging: \_\_\_\_\_ Latest date of imaging: \_\_\_\_\_

Bone scan: Yes ☐<sub>1</sub> No ☐<sub>0</sub>

Initial date of imaging: \_\_\_\_\_ Latest date of imaging: \_\_\_\_\_

MRI: Yes ☐<sub>1</sub> No ☐<sub>0</sub>

Initial date of imaging: \_\_\_\_\_ Latest date of imaging: \_\_\_\_\_

#### 5. TOTAL CONTACT CASTING TREATMENT

TCC start date: \_\_\_\_\_ TCC cessation date: \_\_\_\_\_

Duration of TCC treatment (months): \_\_\_\_\_

**Total number of TCC applications:** \_\_\_\_\_

**Ambulation status (while in TCC):**

- ☐<sub>1</sub> Walking with post-op shoe
- ☐<sub>2</sub> Wheelchair bound
- ☐<sub>3</sub> Crutches
- ☐<sub>4</sub> Scooter
- ☐<sub>5</sub> Other

**TCC complications/adverse events:** Yes ☐<sub>1</sub> No ☐<sub>0</sub>

**Types of complications/adverse events:**

- ☐<sub>1</sub> Ulceration
- ☐<sub>2</sub> Amputation
- ☐<sub>3</sub> Infection
- ☐<sub>4</sub> Deep vein thrombosis
- ☐<sub>5</sub> Fall(s)
- ☐<sub>6</sub> Asymmetry pain (e.g. hip, back, knee, ankle pain)
- ☐<sub>7</sub> Rubbing/irritation
- ☐<sub>8</sub> Self-inflicted (e.g. placing objects within TCC, self-modification of TCC)
- ☐<sub>9</sub> Other

**Total number of TCC complications/adverse events:** \_\_\_\_\_

**Treatment after TCC:**

- ☐<sub>1</sub> Specialised footwear and custom foot orthoses
- ☐<sub>2</sub> Charcot Restraint Orthotic Walker (CROW)
- ☐<sub>3</sub> Reconstructive/bone surgery
- ☐<sub>4</sub> Soft-tissue surgery
- ☐<sub>5</sub> CAM Walker

**Recurrent Charcot foot:** Yes ☐<sub>1</sub> No ☐<sub>0</sub>

**Charcot foot pattern:**

- ☐<sub>1</sub> Forefoot joints
- ☐<sub>2</sub> Tarsometatarsal joints
- ☐<sub>3</sub> Naviculocuneiform, talonavicular and calcaneocuboid joints
- ☐<sub>4</sub> Ankle and subtalar joints
- ☐<sub>5</sub> Calcaneus
- ☐<sub>6</sub> Combination\_\_\_\_\_ (describe)

**Contralateral Charcot foot:** Yes ☐<sub>1</sub> No ☐<sub>0</sub>

**Charcot foot pattern:**

- ☐<sub>1</sub> Forefoot joints
- ☐<sub>2</sub> Tarsometatarsal joints
- ☐<sub>3</sub> Naviculocuneiform, talonavicular and calcaneocuboid joints

- ☐<sub>4</sub> Ankle and subtalar joints  
☐<sub>5</sub> Calcaneus  
☐<sub>6</sub> Combination\_\_\_\_\_ (describe)

## 6. DERMAL TEMPERATURES

| Site | Anatomical location                                                | Temperature differential (°C):<br>Charcot <u>diagnosis</u> | Temperature differential (°C):<br>Charcot <u>resolution</u> |
|------|--------------------------------------------------------------------|------------------------------------------------------------|-------------------------------------------------------------|
| 1    | Plantar 1st metatarsal head                                        |                                                            |                                                             |
| 2    | Plantar 3rd metatarsal head                                        |                                                            |                                                             |
| 3    | Plantar 5th metatarsal head                                        |                                                            |                                                             |
| 4    | Plantar aspect of the base of the 5th metatarsal (styloid process) |                                                            |                                                             |
| 5    | Dorsal aspect of the base of the 3rd metatarsal                    |                                                            |                                                             |
| 6    | Medial aspect of the base of the 1st metatarsal                    |                                                            |                                                             |
| 7    | Medial aspect of the navicular                                     |                                                            |                                                             |
| 8    | Plantar medial tubercle of the calcaneus                           |                                                            |                                                             |
| 9    | Medial malleolus                                                   |                                                            |                                                             |
| 10   | Lateral malleolus                                                  |                                                            |                                                             |
